# Supplementary material for: Impact of COVID-19 on Antimicrobial Consumption and Spread of Multidrug-Resistance in Bacterial Infections
Source: MDPI journal article supplement (doi:10.3390/antibiotics11040535), 2022-04-18
Supplement: s1 [file s1]

**Table S1.** Prevalence of vancomycin-resistant *Enterococcus* isolates from clinical and surveillance samples.

| VRE species         | Ward                              |                                   |             |          | ICU                               |                                   |             |          |
|---------------------|-----------------------------------|-----------------------------------|-------------|----------|-----------------------------------|-----------------------------------|-------------|----------|
|                     | March 2018<br>- September<br>2019 | March 2020<br>- September<br>2021 | %<br>change | <i>p</i> | March 2018<br>- September<br>2019 | March 2020<br>- September<br>2021 | %<br>change | <i>p</i> |
| <b>Clinical</b>     |                                   |                                   |             |          |                                   |                                   |             |          |
| <i>E. faecium</i>   | 0.46                              | 0.68                              | +50.1       | < 0.001  | 1.48                              | 1.90                              | +28.6       | 0.094    |
| <i>E. faecalis</i>  | 0.01                              | 0.01                              | +19.4       | 0.439    | 0.04                              | 0.02                              | -37.5       | 1.000    |
| <b>Surveillance</b> |                                   |                                   |             |          |                                   |                                   |             |          |
| <i>E. faecium</i>   | 0.45                              | 0.42                              | -8.2        | 0.424    | 3.75                              | 1.31                              | -65.1       | < 0.001  |
| <i>E. faecalis</i>  | 0.01                              | 0.01                              | +39.3       | 0.395    | 0.04                              | 0.04                              | +24.9       | 0.731    |

Values are presented as infection cases/1000 patient-days

VRE, vancomycin-resistant *Enterococcus*; ICU, intensive care unit.

**Table S2.** Prevalence of carbapenem-resistant *Enterobacteriaceae* isolates from clinical and surveillance samples.

| CRE species              | Ward                              |                                   |          |          | ICU                               |                                   |          |          |
|--------------------------|-----------------------------------|-----------------------------------|----------|----------|-----------------------------------|-----------------------------------|----------|----------|
|                          | March 2018<br>- September<br>2019 | March 2020<br>- September<br>2021 | % change | <i>P</i> | March 2018<br>- September<br>2019 | March 2020<br>- September<br>2021 | % change | <i>P</i> |
| <b>Clinical</b>          |                                   |                                   |          |          |                                   |                                   |          |          |
| <i>K. pneumoniae</i>     | 0.15                              | 0.22                              | +45.4    | < 0.001  | 0.75                              | 1.25                              | +67.6    | < 0.001  |
| <i>Escherichia coli</i>  | 0.06                              | 0.09                              | +58.0    | < 0.001  | 0.09                              | 0.13                              | +36.1    | 0.281    |
| <i>Enterobacter</i> spp. | 0.04                              | 0.03                              | -36.8    | 0.175    | 0.14                              | 0.08                              | -42.7    | 0.204    |
| <i>Serratia</i> spp.     | 0.01                              | 0.01                              | +49.2    | 0.251    | 0.07                              | 0.08                              | +14.5    | 0.611    |
| <i>Klebsiella</i> spp.   | 0.01                              | 0.01                              | -12.5    | 0.991    | 0.05                              | 0.07                              | +33.8    | 0.451    |
| <i>Citrobacter</i> spp.  | 0.01                              | 0.01                              | +118.8   | 0.06     | 0.02                              | 0.03                              | +38.8    | 0.713    |
| Others                   | 0.00                              | 0.00                              | -        | 0.143    | 0.00                              | 0.01                              | +        | 0.219    |
| <b>Surveillance</b>      |                                   |                                   |          |          |                                   |                                   |          |          |
| <i>K. pneumoniae</i>     | 0.29                              | 0.44                              | +52.4    | < 0.001  | 2.58                              | 2.86                              | +10.7    | 0.009    |
| <i>Escherichia coli</i>  | 0.06                              | 0.09                              | +45.2    | 0.001    | 0.58                              | 0.48                              | -17.5    | 0.521    |
| <i>Enterobacter</i> spp. | 0.04                              | 0.06                              | +23.9    | 0.066    | 0.70                              | 0.44                              | -38.0    | 0.016    |
| <i>Serratia</i> spp.     | 0.00                              | 0.00                              | +19.4    | 1        | 0.06                              | 0.04                              | -21.9    | 0.764    |
| <i>Klebsiella</i> spp.   | 0.02                              | 0.03                              | +85.7    | 0.010    | 0.31                              | 0.26                              | -15.3    | 0.726    |
| <i>Citrobacter</i> spp.  | 0.02                              | 0.02                              | +30.7    | 0.176    | 0.18                              | 0.11                              | -37.5    | 0.235    |
| Others                   | 0.00                              | 0.00                              | +258.1   | 0.327    | 0.01                              | 0.03                              | +108.2   | 0.428    |

Values are presented as infection cases/1000 patient-days

CRE, carbapenem-resistant *Enterobacteriaceae*; ICU, intensive care unit; *Enterobacter* spp.: *E. cloacae*, *E. cancerogenus*, *E. hormaechei*, *E. kobei*; *Serratia* spp.: *S. liquefaciens*, *S. marcescens*; *Klebsiella* spp.: *K. aerogenes*, *K. oxytoca*, *K. ozaenae*, *K. variicola*; *Citrobacter* spp.: *C. amalonaticus*, *C. braakii*, *C. koseri*, *C. freundii*; Others: *Cronobacter sakazakii* complex, *Hafnia alvei*, *Kluyvera cryocrescens*, *Providencia rettgeri*, *Providencia stuartii*, and *Raoultella planticola*.
